# Supplementary material
Source: PubMed Central journal article supplement (PMC6124419)

**Figure S1**

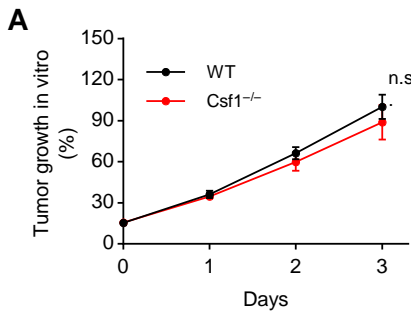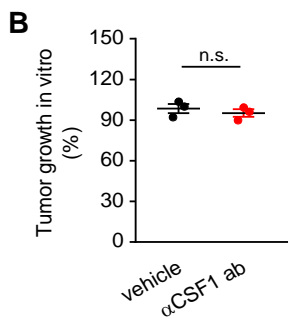

**Figure S2**

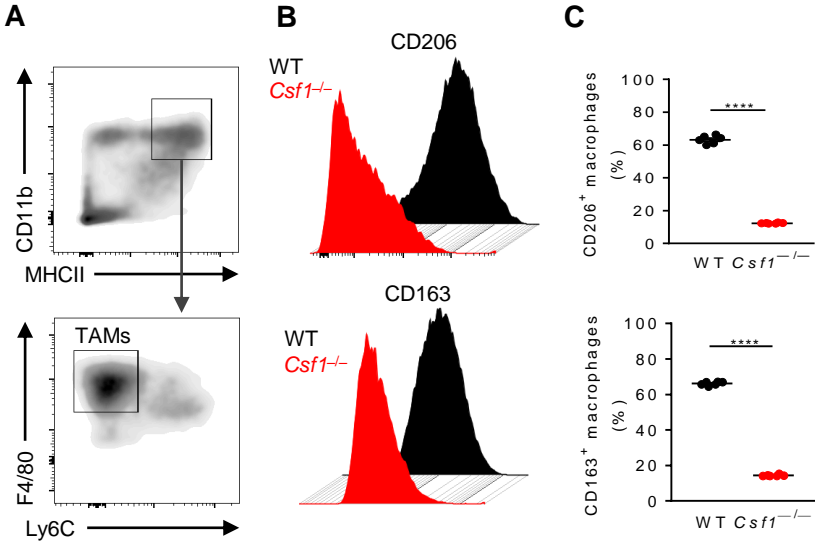

**Figure S3**

**A**

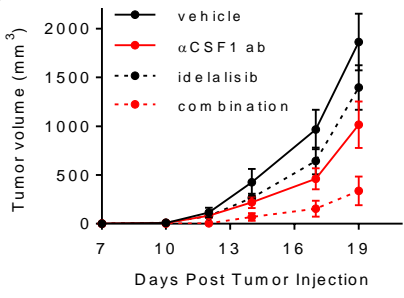

**B**

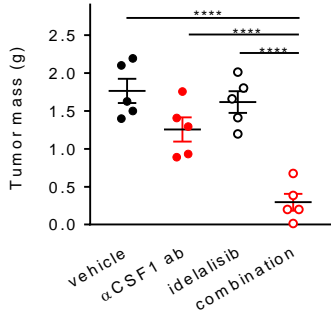

Supplement: jciinsight-3-120631-s108.pdf [file jciinsight-3-120631-s108.pdf]
